# Supplementary material for: Construction of 0D to 3D cadmium complexes from different pyridyl diimide ligands
Source: Royal Society of Chemistry journal article supplement (doi:10.1039/c2dt11815g), 2012-01-01
Supplement: c2dt11815g.pdf [file c2dt11815g.pdf]

## Supporting Information

### Construction of 0-D to 3-D cadmium complexes from different pyridyl diimide ligands

Guo-Bi Li, Jian-Rong He, Mei Pan, Hai-Ying Deng, Jun-Min Liu, and Cheng-Yong Su

MOE Laboratory of Bioinorganic and Synthetic Chemistry/KLGHEI of Environment and Energy Chemistry, State Key Laboratory of Optoelectronic Materials and Technologies, School of Chemistry and Chemical Engineering, Sun Yat-Sen University, Guangzhou, 510275, China, and State Key Laboratory of Applied Organic Chemistry, Lanzhou University, Lanzhou 730000, China.

#### Scheme S1 The different conformations of the ligand $L^1$ , $L^2$ , $L^3$ , and $L^4$ .

a. Four conformations of the ligand  $L^1$ .

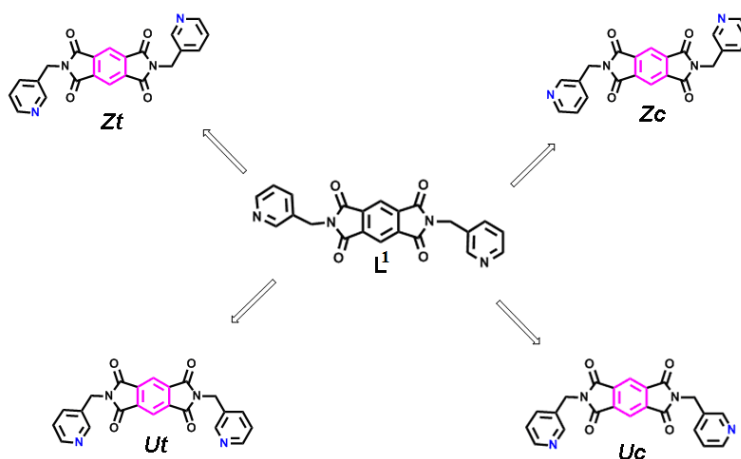

b. Two conformations of the ligand  $L^2$ .

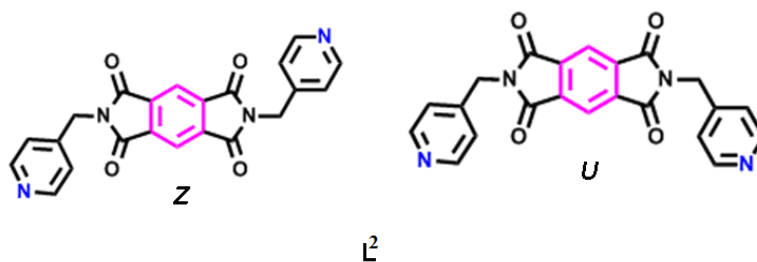

$L^2$

c. Four conformations of the ligand  $L^3$ .

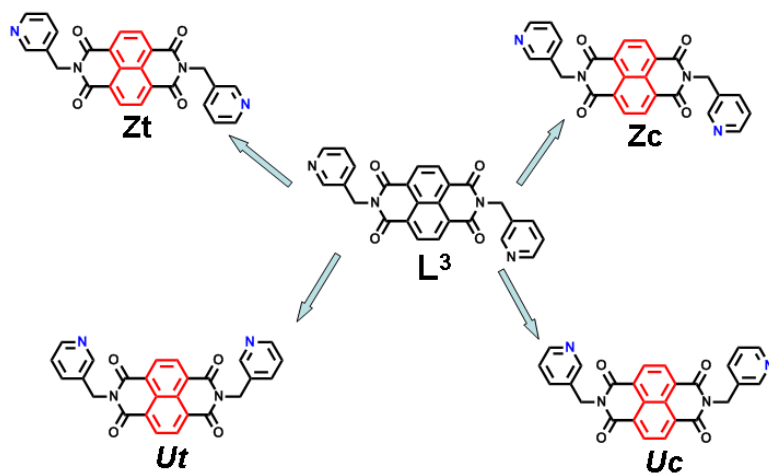

d. Two conformations of the ligand  $L^4$ .

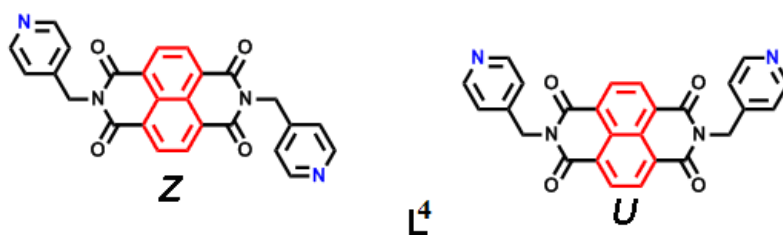

Fig. S1 PXRD patterns for complexes 1, 2, and 4.

1:

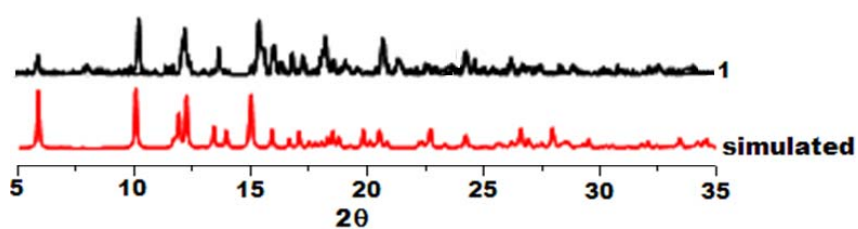

2:

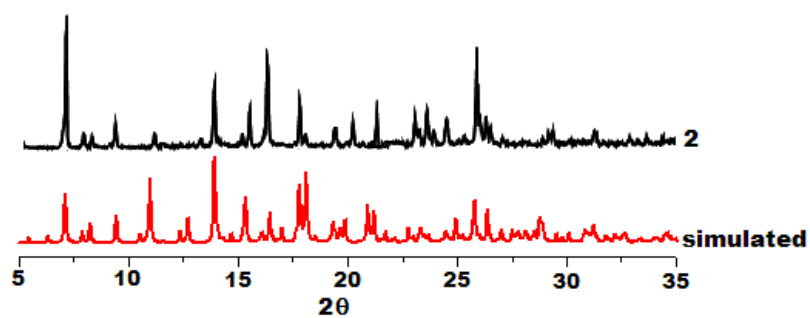

4:

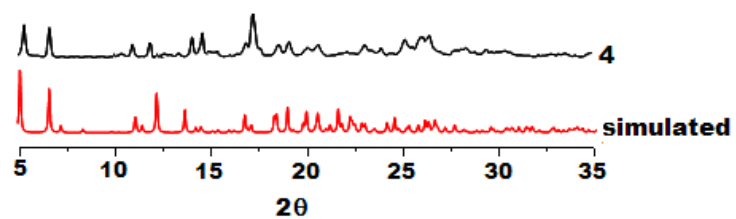

**Fig. S2** TGA curve for complexes **1**, **2**, and **4**.

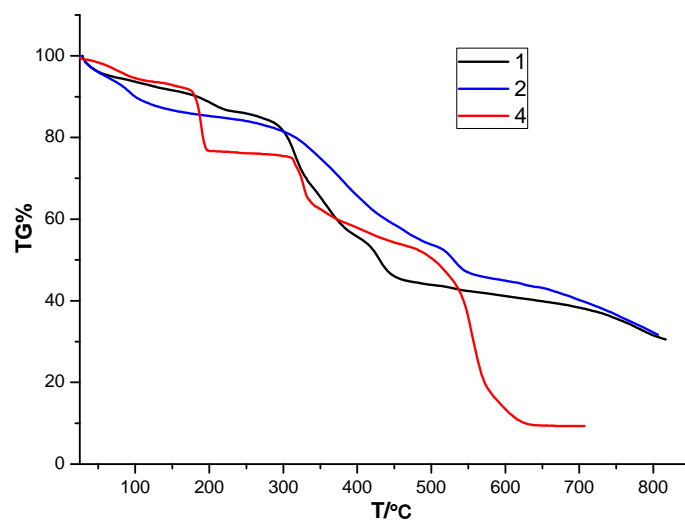

TGA curve of complexes **1**, **2**, and **4**.
